# Supplementary material
Source: publisher figshare collection journal article supplement (https://aacr.figshare.com/articles/dataset/_/23553180)
Supplement: Supplementary file 1 [file 41323689]

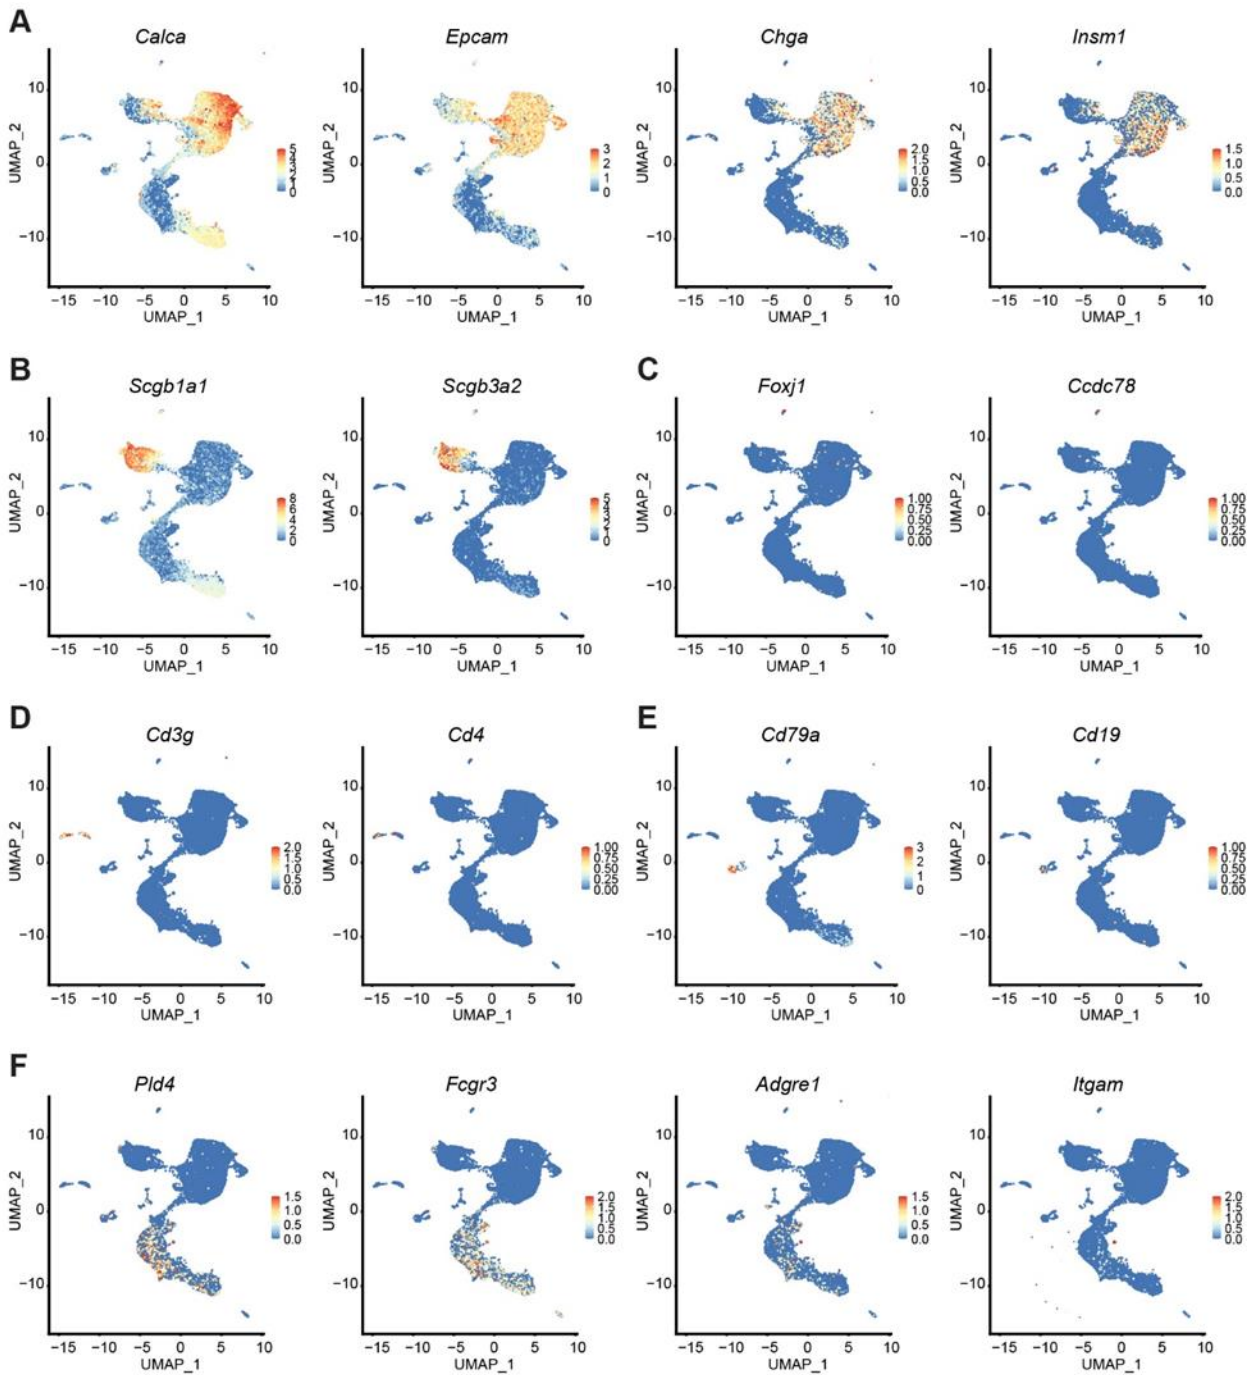

**Supplementary Figure S2 | Characterization of cell types isolated from the autochthonous scRNA-seq data.** Marker expression for SCLC (A), club cells (B) ciliated cells (C) T-cells (D) B-cells (E) myeloid cells (F).
